# Supplementary material for: Prognostic value of circulating microRNAs in upper tract urinary carcinoma
Source: PubMed Central journal article supplement (PMC5908279; doi:10.18632/oncotarget.24672), 2018-03-30
Supplement: oncotarget-09-16691-s001.pdf [file oncotarget-09-16691-s001.pdf]

# Prognostic value of circulating microRNAs in upper tract urinary carcinoma

## SUPPLEMENTARY MATERIALS

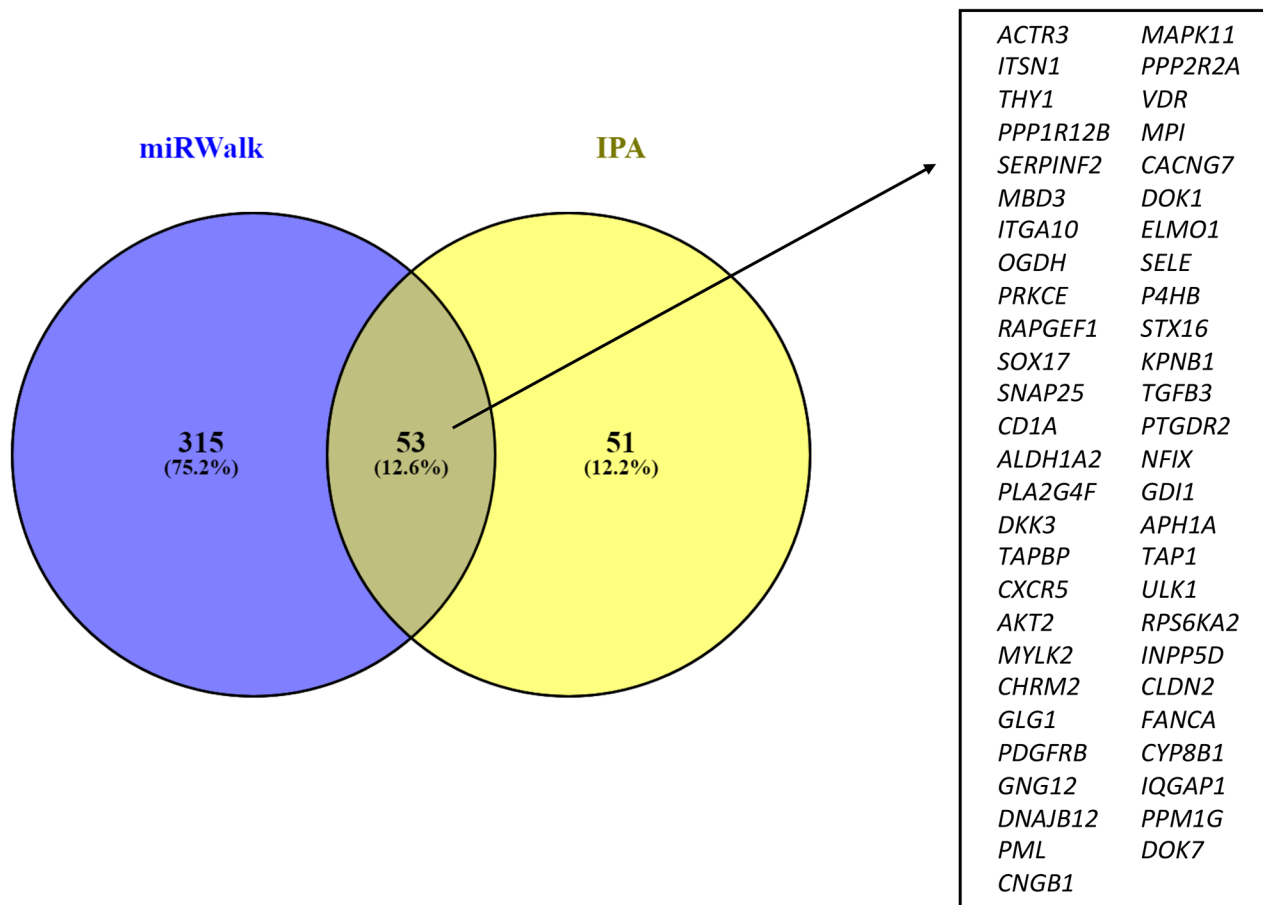

**Supplementary Figure 1:** Venny diagram showing target genes for miR-151b from miRWalk and IPA analysis. The 53 genes in common are listed in the box.

**Supplementary Table 1:** IPA predicted gene targets for miR-151b using TargetScan Human source.

See Supplementary File 1
